# Supplementary material for: Evaluation of a Dragons’ Den–inspired symposium to spread primary health care innovations in Quebec, Canada: a mixed-methods study using quality-improvement e-surveys
Source: PubMed Central journal article supplement — CMAJ Open. 2022 Mar 22;10(1):E247–54. doi: 10.9778/cmajo.20200251 (PMC8946644; doi:10.9778/cmajo.20200251), 2022-03-22
Supplement: open-2020-0251-squire-checklist.pdf [file open-2020-0251-squire-checklist.pdf]

## Revised Standards for Quality Improvement Reporting Excellence (SQUIRE 2.0)

| Title and Abstract            |                                                                                                                                                                                                                                                                                                                                                               | In Manuscript                          |
|-------------------------------|---------------------------------------------------------------------------------------------------------------------------------------------------------------------------------------------------------------------------------------------------------------------------------------------------------------------------------------------------------------|----------------------------------------|
| <b>1. Title</b>               | Indicate that the manuscript concerns an initiative to improve healthcare (broadly defined to include the quality, safety, effectiveness, patient-centeredness, timeliness, cost, efficiency, and equity of healthcare)                                                                                                                                       | Title                                  |
| <b>2. Abstract</b>            | <ul style="list-style-type: none"> <li>a. Provide adequate information to aid in searching and indexing</li> <li>b. Summarize all key information from various sections of the text using the abstract format of the intended publication or a structured summary such as: background, local problem, methods, interventions, results, conclusions</li> </ul> | Abstract contains all key information. |
| <b>3. Problem Description</b> | Nature and significance of the local problem                                                                                                                                                                                                                                                                                                                  | Lines 2 to 23                          |
| <b>4. Available knowledge</b> | Summary of what is currently known about the problem, including relevant previous studies                                                                                                                                                                                                                                                                     | Lines 7 to 11.                         |
| <b>5. Rationale</b>           | Informal or formal frameworks, models, concepts, and/or theories used to explain the problem, any reasons or assumptions that were used to develop the intervention(s), and reasons why the intervention(s) was expected to work                                                                                                                              | Lines 11-20                            |
| <b>6. Specific aims</b>       | Purpose of the project and of this report                                                                                                                                                                                                                                                                                                                     | Lines 20-23                            |
| <b>Methods</b>                | <i>What did you do?</i>                                                                                                                                                                                                                                                                                                                                       | Lines 14-25 and Lines 26-31            |
| <b>7. Context</b>             | Contextual elements considered important at the outset of introducing the intervention(s)                                                                                                                                                                                                                                                                     | Lines 51-69                            |
| <b>8. Intervention(s)</b>     |                                                                                                                                                                                                                                                                                                                                                               |                                        |

|                                        |                                                                                                                                                                                                                                                                                                                                                                                                                                                                                |                                                                                                      |
|----------------------------------------|--------------------------------------------------------------------------------------------------------------------------------------------------------------------------------------------------------------------------------------------------------------------------------------------------------------------------------------------------------------------------------------------------------------------------------------------------------------------------------|------------------------------------------------------------------------------------------------------|
|                                        | <ul style="list-style-type: none"> <li>a. Description of the intervention(s) in sufficient detail that others could reproduce it</li> <li>b. Specifics of the team involved in the work</li> </ul>                                                                                                                                                                                                                                                                             | Lines 26-31                                                                                          |
| <b>9. Study of the Intervention(s)</b> | <ul style="list-style-type: none"> <li>a. Approach chosen for assessing the impact of the intervention(s)</li> <li>b. Approach used to establish whether the observed outcomes were due to the intervention(s)</li> </ul>                                                                                                                                                                                                                                                      |                                                                                                      |
| <b>10. Measures</b>                    | <ul style="list-style-type: none"> <li>a. Measures chosen for studying processes and outcomes of the intervention(s), including rationale for choosing them, their operational definitions, and their validity and reliability</li> <li>b. Description of the approach to the ongoing assessment of contextual elements that contributed to the success, failure, efficiency, and cost</li> <li>c. Methods employed for assessing completeness and accuracy of data</li> </ul> | Lines 71-83 and 85-105                                                                               |
| <b>11. Analysis</b>                    | <ul style="list-style-type: none"> <li>a. Qualitative and quantitative methods used to draw inferences from the data</li> <li>b. Methods for understanding variation within the data, including the effects of time as a variable</li> </ul>                                                                                                                                                                                                                                   | Lines 107-116                                                                                        |
| <b>12. Ethical Considerations</b>      | Ethical aspects of implementing and studying the intervention(s) and how they were addressed, including, but not limited to, formal ethics review and potential conflict(s) of interest                                                                                                                                                                                                                                                                                        | Lines 118-119                                                                                        |
| <b>13. Results</b>                     | <ul style="list-style-type: none"> <li>a. Initial steps of the intervention(s) and their evolution over time (<i>e.g.</i>, time-line diagram, flow chart, or table), including modifications made to the intervention during the project</li> </ul>                                                                                                                                                                                                                            | <p>Figure 1 and Tables 2 to 4</p> <p>Lines 121-153</p> <p>Missing data reported in Tables 2 to 4</p> |

- b. Details of the process measures and outcome
- c. Contextual elements that interacted with the intervention(s)
- d. Observed associations between outcomes, interventions, and relevant contextual elements
- e. Unintended consequences such as unexpected benefits, problems, failures, or costs associated with the intervention(s).
- f. Details about missing data

**Discussion**

***What does it mean?***

Lines 156-167

**14. Summary**

- a. Key findings, including relevance to the rationale and specific aims
- b. Particular strengths of the project

Lines 169-189

**15. Interpretation**

- a. Nature of the association between the intervention(s) and the outcomes
- b. Comparison of results with findings from other publications
- c. Impact of the project on people and systems
- d. Reasons for any differences between observed and anticipated outcomes, including the influence of context
- e. Costs and strategic trade-offs, including opportunity costs

Lines 191-207

**16. Limitations**

- a. Limits to the generalizability of the work
- b. Factors that might have limited internal validity such as confounding, bias, or imprecision in the design, methods, measurement, or analysis
- c. Efforts made to minimize and adjust for limitations

Lines 209-228

**17. Conclusions**

- a. Usefulness of the work
- b. Sustainability

- c. Potential for spread to other contexts
- d. Implications for practice and for further study in the field
- e. Suggested next steps

**18. Funding**

Sources of funding that supported this work. Role, if any, of the funding organization in the design, implementation, interpretation, and reporting

In CMAJ open submission form
